# Supplementary material for: CircFOXM1 promotes proliferation and metastasis of hepatocellular carcinoma via regulating miR-1179/SPAG5 axis
Source: PubMed Central journal article supplement (PMC8668908; doi:10.1038/s41598-021-03285-w), 2021-12-13

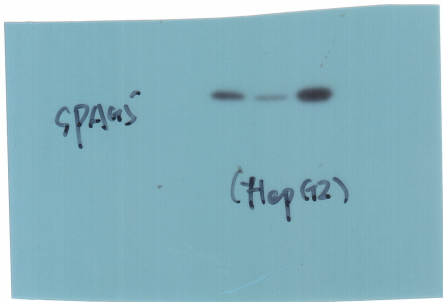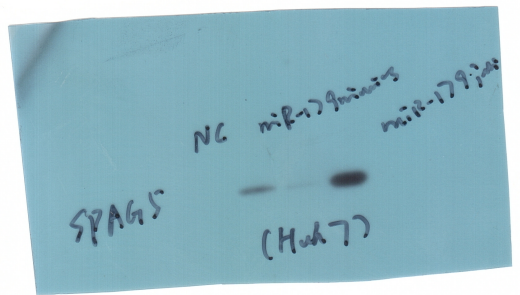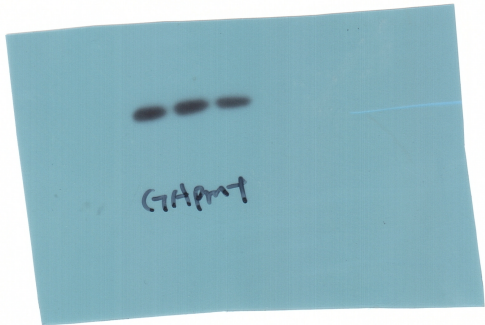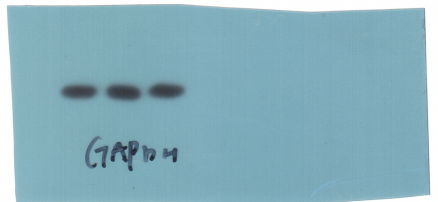

Supplement: 41598_2021_3285_MOESM1_ESM.pdf [file 41598_2021_3285_MOESM1_ESM.pdf]
